# Supplementary material
Source: Elsevier journal article supplement (https://www.sciencedirect.com/science/article/pii/S2253654X16300841)
Supplement: mmc1 [file S2253654X16300841:mmc1.docx]

1. [{(Anexo A)}] Material suplementario

**GAMMAGRAFÍA CON 75SeHCAT EN LA DIARREA CRÓNICA POR MALABSORCIÓN DE ÁCIDOS BILIARES. REVISIÓN DE LA BIBLIOGRAFÍA.**

**75SeHCAT SCAN IN BILE ACID MALABSORPTION IN CHRONIC DIARRHOEA. REVIEW ARTICLE.**

**Resumen**

La diarrea crónica es una entidad común en la práctica clínica diaria y supone un deterioro en la calidad de vida de los pacientes. Puede ser el síntoma principal de múltiples etiologías entre las que se encuentra la malabsorción de ácidos biliares (MAB), que en la población general presenta una prevalencia comparable a la enfermedad celíaca. La MAB ocurre por una alteración en la homeostasis de los ácidos biliares en la circulación enterohepática. Puede aparecer como consecuencia de una disfunción o enfermedad ileal (MAB tipo I), por causas idiopáticas (MAB tipo II) o asociada con otras entidades gastrointestinales (MAB tipo III). Entre los diferentes métodos diagnósticos disponibles destacamos la gammagrafía con 75SeHCAT como *gold standard* debido a sus valores de sensibilidad, especificidad, seguridad y bajo coste. La principal desventaja es que no se encuentra disponible en todos los países por lo que se han desarrollado otros métodos como la medición sérica de FGF19 y C4 que, sin embargo, presentan una mayor complejidad y coste. El tratamiento de primera línea ante un diagnóstico de MAB es con quelantes de ácidos biliares como la colestiramina, pero presenta baja tolerabilidad y efectos secundarios, que son menores con los nuevos fármacos como el colesevelam. En resumen, la MAB es una entidad común que se encuentra infradiagnosticada e infratratada, por lo que es fundamental establecer un adecuado algoritmo diagnóstico de la diarrea crónica en el que el estudio con 75SeHCAT ocuparía la primera o segunda línea en el diagnóstico diferencial de estos pacientes.

**Abstract**

Chronic diarrhoea is a common entity in daily clinical practice and it leads to a loss in these patients quality of life. It may be the main symptom of multiple ethiologies including bile acid malabsorption (BAM) which has a comparable prevalence to celiac disease. The BAM results from imbalances in the homeostasis of bile acids in the enterohepatic circulation. It can be a consequence of ileal disease or ileal dysfunction (BAM type I), it can be considered idiopathic or primary (BAM type II) or associated with other gastrointestinal entities (BAM type III). Among the different diagnostic methods available, 75SeHCAT study is the primary current method due to its sensitivity, specificity, safety and low cost. The main disadvantage is that it´s not available in all countries, so other diagnostic methods have appeared, such as serum measurement of FGF19 and C4, however they are significantly more complex and costly. The first-line treatment of bile acid diarrhoea is bile acid sequestrant, such as cholestyramine, which can be difficult to administer due to its poor tolerability and gastrointestinal side effects. These are less prominent with newer agents such as colesevelam. In summary, the BAM is a common entity underdiagnosed and undertreated, so it is essential to establish a diagnosis algorithm of chronic diarrhoea in which the 75SeHCAT study would be first or second line in the differential diagnosis of these patients.

**Palabras claves:** 75SeHCAT, diarrea crónica, malabsorción de ácidos biliares, algoritmo diagnóstico, quelantes de ácidos biliares.

**Keywords:** 75SeHCAT, chronic diarrhoea, bile acid malabsorption, diagnostic algorithm, bile acid sequestrants.

**Introducción**

La diarrea se define como cualquier variación significativa de las características de las deposiciones con respecto al hábito deposicional previo del paciente, ya sea por aumento del volumen o de la frecuencia, o bien por disminución de la consistencia de las heces1.

Si se tiene en cuenta el peso de las heces, se considera diarrea cuando éste es superior a 200 g/día. Sin embargo, esta definición no tiene en cuenta que las personas que tienen una elevada ingesta de fibra insoluble al día (300 g/día) pueden presentar un peso elevado, pero la consistencia será normal; además, algunos pacientes pueden presentar un peso normal con una consistencia líquida. Es importante diferenciar la diarrea de la pseudodiarrea que se define como un aumento en la frecuencia del ritmo deposicional pero con heces sólidas.

Para que la diarrea se pueda considerar crónica se establece de forma arbitraria que su periodo de duración tiene que ser superior a 4 semanas. Su prevalencia es del 3-5% en el mundo occidental y asciende hasta un 7-14% en pacientes con edad superior a 65 años2, siendo por tanto un problema común en la práctica clínica diaria, que conlleva un deterioro en la calidad de vida de los pacientes.

La diarrea crónica puede ser el síntoma principal de múltiples etiologías (Tabla 1). Sin embargo, en la práctica clínica presenta un mayor interés realizar una diferenciación entre diarrea crónica con características de funcionalidad o de organicidad. Para ello, ante un paciente que presente estos síntomas el estudio inicial debe incluir una anamnesis exhaustiva, una exploración física completa, pruebas de laboratorio y exploraciones funcionales como: colonoscopia/ileoscopia, prueba de aliento de hidrógeno, tránsito intestinal, enterorresonancia, cápsula endoscópica, ecografía abdominal, manometría anorrectal o gammagrafía con ácido homotaurocólico marcado con 75Se (75SeHCAT), adecuadamente orientadas según la sospecha sindrómica.

El objetivo principal al que se enfrenta el especialista al iniciar el estudio de un paciente con diarrea crónica es conseguir un diagnóstico de la manera más precoz y eficiente posible, con el fin de establecer el tratamiento más adecuado.

**Malabsorción de Ácidos Biliares**

En la clasificación etiológica de la diarrea crónica, una de las causas es la malabsorción de ácidos biliares (MAB) que en la población general presenta una prevalencia comparable a la enfermedad celíaca (6-3%. p=0,72)3 y, en pacientes seleccionados, es la causa más frecuente (en algunas publicaciones con una prevalencia próxima al 50%)4. Por tanto, se debe considerar esta etiología de forma temprana en el algoritmo diagnóstico de la diarrea crónica.

El primer paso para poder comprender el mecanismo que subyace a esta entidad clínica es analizar la síntesis y secreción de los ácidos biliares.

*Ácidos Biliares*

Son sintetizados en el hígado a partir del colesterol (0,2-0,4 g/día) y se clasifican en dos grupos:

-Primarios: sintetizados en el hígado (ácido cólico y quenodesoxicólico).

-Secundarios: formados en el colon a partir de las bacterias que transforman el ácido cólico en desoxicólico y el quenodesoxicólico en litocólico.

Además, existen los ácidos biliares conjugados que se sintetizan en el hígado a partir del colesterol y de la conjugación con los aminoácidos lisina (ácido glicocólico) y taurina (ácido taurocólico)5.

Los ácidos biliares son liberados al duodeno donde facilitan la absorción de las vitaminas liposolubles y son responsables de la emulsión y digestión de los ácidos grasos de la dieta a través de la formación de micelas. Tras su secreción son conjugados e ionizados en su mayor parte, y posteriormente son reabsorbidos de forma activa en el íleon terminal a través del transportador específico dependiente de Na+ apical (ASBT) localizado en el borde en cepillo de los enterocitos. Una vez reabsorbidos, regresan al hígado a través de la vena porta constituyendo la circulación enterohepática, se absorben activamente a través de la membrana sinusoidal del hepatocito y son secretados nuevamente a la bilis, la cual presenta una concentración de ácidos biliares primarios y secundarios a razón de 3:16,7.

La circulación enterohepática permite una reabsorción aproximada del 95% de los ácidos biliares, por tanto, un 5% pasa al colon donde se producen los ácidos biliares secundarios. Estos ácidos biliares son responsables de estimular la secreción de electrolitos y agua así como de aumentar la motilidad, disminuyendo el tiempo de tránsito colónico. La pérdida que se produce a través de las heces es inferior a 0,5 g/día. El tiempo medio de reciclado se encuentra en torno a 3-4 horas, por lo que al día se producen un total de 4-6 ciclos8.

Para la regulación de este proceso se ha propuesto la existencia de un mecanismo de *feedback* negativo que tiene lugar una primera parte en el enterocito y una segunda parte en el hepatocito.

-Enterocito: los ácidos biliares estimulan la liberación del factor de crecimiento del fibroblasto 19 (FGF19) a la circulación enterohepática, el cual se encuentra bajo el control transcripcional del receptor farnesoide X (FXR) que es un miembro de la familia de los receptores de las hormonas esteroideas. Además, los ácidos biliares activan la transcripción del factor del FXR, siendo el ácido quenodesoxicólico su ligando más potente.

-Hepatocito: el FGF19 se une a su receptor de superficie (FGF R4), provocando la inhibición transcripcional del gen CYP7A1 que codifica a la 7α-colesterol-hidroxilasa, que es la enzima limitante de la síntesis de nuevos ácidos biliares y, por tanto, la responsable de este *feedback*. A su vez, esta enzima es responsable de la producción de 7α-hidroxy-4-cholesten-3-one (C4), que actúa como intermediario, aumentando de forma proporcional al incremento de la síntesis de ácidos biliares y, además, es un marcador indirecto de la actividad enzimática del gen CYP7A15,9,10.

En condiciones normales, los niveles séricos de FGF19 aumentan pocas horas después de la ingesta, cuando la reabsorción ileal de ácidos biliares es máxima, existiendo una relación inversamente proporcional entre los niveles de FGF19 y C410.

*Mecanismos de producción de diarrea*

La MAB ocurre por una alteración en la circulación enterohepática que va a tener dos consecuencias: por una parte, se produce una malabsorción de las grasas que lleva a la aparición de esteatorrea, y por otra parte, se produce un aumento en la proporción de ácidos biliares secretados que no son reabsorbidos en el íleon y pasan al colon donde producen diarrea a través de los siguientes mecanismos: inducen secreción de Na+ y agua, estimulan la defecación, inducen la secreción de moco, y dañan a la mucosa probablemente por incremento de la permeabilidad5.

La causa de la diarrea por ácidos biliares se ha atribuido históricamente a la MAB. Sin embargo, este término no es enteramente correcto. En la actualidad se asume que hay dos mecanismos diferentes que conducen al mismo síntoma (diarrea):

a) MAB verdadera: existe una alteración en la absorción de ácidos biliares en el íleon terminal, bien por enfermedad o por disfunción de la mucosa.

b) Diarrea de ácidos biliares: la capacidad de absorción se encuentra normal o incluso está aumentada y la causa es el incremento de la síntesis hepática de los ácidos biliares10.

*Métodos diagnósticos*

Existen cinco métodos que permiten establecer el diagnóstico de MAB:

a) Determinación fecal de ácidos biliares en 24 horas: es un método tedioso que sólo está disponible hoy día en algunos laboratorios11.

b) Test de aliento con ácido 14C-glicólico: en la actualidad presenta una utilidad clínica limitada12.

c) Gammagrafía con 75SeHCAT: mide la retención abdominal del ácido biliar sintético homocólico conjugado con taurina y marcado con 75Se. Este método ha sido ampliamente validado y presenta una buena correlación con la pérdida de ácidos biliares en heces, con unos niveles de radiación muy bajos para el paciente13.

d) Niveles séricos de C4: se realiza mediante cromatografía líquida y su valor aumenta cuando se incrementa la síntesis de ácidos biliares. Pueden existir falsos positivos en pacientes con enfermedades hepáticas o que estén recibiendo tratamiento con estatinas y, además, su valor se puede alterar con el ritmo circadiano14.

e) Niveles séricos de FGF19: se determina mediante la técnica de ELISA y su valor está inversamente relacionado con el de C44. Por tanto, en presencia de MAB los niveles estarán disminuidos5.

Otra opción diagnóstica es el test de colestiramina, que es un quelante de ácidos biliares. Consiste en realizar un tratamiento empírico en aquellos pacientes que presenten sospecha de MAB. Es necesario administrar una dosis elevada de tratamiento durante 10 días, en los pacientes en los que ha sido efectivo el tratamiento se suspende durante 7 días y si los síntomas de MAB aparecen de nuevo el test será positivo. No es recomendable el uso de este método debido a: los efectos secundarios que puede causar, la dosis eficaz es difícil de predecir y se basa fundamentalmente en el individuo, pudiendo existir hasta un 25% de falsos negativos y, además, no es específico para MAB, ya que la colestiramina puede inactivar otros agentes etiológicos como la toxina *Clostridium Difficile*5,14,15,16.

Al analizar los métodos diagnósticos se considera como *gold standard* el test de 75SeHCAT en base a los valores de sensibilidad y especificidad (75SeHCAT: 80-94%; 70-100%. Niveles de C4: 90-97%; 74-77%. Niveles de FGF19: 58-74%; 72-79%; respectivamente)13,17,18, a su seguridad y su bajo coste19. El principal problema es que no se encuentra disponible en todos los países, como por ejemplo Estados Unidos. Por ello, en los últimos años se ha desarrollado la técnica de medición sérica de C4 y FGF19. La desventaja de estos últimos es que están limitados a laboratorios con un equipamiento específico, no existe aún una clara estandarización debido a la naturaleza inestable del sustrato, y actualmente presentan un coste elevado5,17,20.

Además, en la literatura existen estudios publicados recientemente como el de Bajor y cols21, que analiza los tres métodos diagnósticos (75SeHCAT, niveles de C4 y de FGF19) en 141 pacientes con síndrome de intestino irritable (SII) (26 con predominio de estreñimiento, 65 con predominio de diarrea y 50 con ritmo alterno) y lo comparan con un grupo control de 29 sujetos sanos con síntomas gastrointestinales en el caso de 75SeHCAT y con 435 individuos sanos en el caso de C4 y FGF19. Los valores de retención abdominal de 75SeHCAT son los que mejor se asocian con el hábito intestinal en los pacientes con SII, lo que les lleva a pensar que es el mejor método diagnóstico en estos pacientes. Además, el diagnóstico de MAB con 75SeHCAT se correlaciona con unos niveles séricos elevados de C4 y bajos de FGF19.

**Gammagrafía con 75SeHCAT**

Como se ha descrito previamente, es el método *gold estándar* para el diagnóstico de MAB basado en la medición del *turnover* de los ácidos biliares a través del ácido homotaurocólico, que es un ácido biliar sintético conjugado resistente a la degradación bacteriana22. Para poder realizar el estudio es necesario unirlo al isótopo 75Se, el cual decae a 75Ar por captura electrónica. Presenta un periodo de semidesintegración de 120 días y emite radiación gamma en tres picos de energía (136 KeV (58%), 264 KeV (58%) y 279 KeV (25%))23.

La presentación de este radiofármaco es en forma de cápsula oral de 0,37 MBq, con una dosis efectiva de radiación en adulto de 0,26 mSv y dosis absorbida de 0,3 μGy/kBq. La dosis absorbida en el intestino delgado y en la vesícula biliar es de 3 y 3,2 μGy/kBq respectivamente, siendo mayor en pacientes con antecedentes de colecistectomía o con daño hepático severo24.

75SeHCAT se absorbe a través del intestino y posteriormente es excretado por el hígado y la vesícula biliar conjuntamente con los otros ácidos biliares y enzimas, participando en la absorción de las grasas de la dieta. A continuación, es reabsorbido en el íleon terminal y retorna a la circulación nuevamente a través de la captación y excreción en el hígado (circulación enterohepática). Tan solo una pequeña proporción se elimina con las heces 25.

Este estudio fue realizado por primera vez en un Servicio de Medicina Nuclear por Boyd y cols23 en 1981 y posteriormente Merrick26 estableció el protocolo tal y como se conoce en la actualidad. En los últimos años existe un interés renovado por esta exploración, después de estar disponible durante décadas en Europa, en base a la revisión sistemática publicada por Wedlake4 en 2009, en la que demuestra que un porcentaje importante de pacientes diagnosticados como SII presentaban en realidad una MAB. Además, se han desarrollado nuevos fármacos para el tratamiento de la MAB con una mejor tolerancia que los clásicos quelantes de ácidos biliares27,28. Todo ello ha provocado que el diagnóstico de MAB en pacientes con diarrea crónica presente en la actualidad una mayor relevancia clínica.

*Procedimiento del estudio*

Es necesario que el paciente realice un ayuno de al menos 4 horas previas a la administración oral de la cápsula de 75SeHCAT y posteriormente debe mantenerlo durante 3-4 horas. Transcurrido ese tiempo se adquiere la fase precoz del estudio. Se realiza una segunda adquisición, habitualmente a la semana de la administración del radiofármaco, cuando han sucedido más de 35 recirculaciones enterohepáticas, en las que se producirá un 83% de pérdida de 75SeHCAT si se asume el 95% como el valor medio de reabsorción de ácidos biliares en cada circulación29.

La opción de escoger este punto en el tiempo (día 7) para la segunda adquisición, no se realiza de forma aleatoria, sino que, tal y como se demuestra en un esquema teórico, la medida de la retención del radiofármaco en el día 7 es la que mejor diferencia las pequeñas variaciones que pueden suceder entre una reabsorción normal de ácidos biliares del 95% en una circulación enterohepática y una anormal, por ejemplo del 93%29.

Se recomienda que los pacientes suspendan el tratamiento con quelantes de ácidos biliares, como la colestiramina, una semana previa al inicio del estudio, y quizás también los antidiarréicos, como la loperamida, si son capaces de tolerarlo durante la semana en la que transcurre la exploración, ya que al menos teóricamente existe una posibilidad de que interfieran en la medición30.

*Medición de la retención corporal de 75SeHCAT*

La retención corporal del radiotrazador parece correlacionarse con la absorción ileal13, 22. Por tanto, hay que medir esta retención en la primera exploración que se realiza el mismo día de la administración de la cápsula y en la del 7º día.

Existen tres métodos para realizar esta medida. En los años 60 se describió por primera vez con los contadores de cuerpo entero, sin embargo, con el tiempo se empezaron a utilizar gammacámaras que están disponibles en todos los Servicios de Medicina Nuclear31. En este último caso, la exploración se puede realizar con gammacámara colimada o no colimada, existiendo estudios a favor y en contra de uno y otro método.

En la Tabla 2 se exponen las principales características de los tres métodos referidos previamente.

El principal problema que existe al realizar esta exploración es la influencia que ejerce la presencia de una fuente de radiación próxima al paciente durante la adquisición del estudio y que va a provocar un aumento en la actividad de fondo y, por tanto, una alteración en la medición de la retención corporal del trazador. Esto ocurre con las gammacámaras no colimadas, por ello, se propone realizar el estudio a primera o a última hora de la jornada de trabajo, cuando el estudio de 75SeHCAT sea el único en el Servicio, evitando así cualquier interferencia. Sin embargo, esto supone alterar la práctica diaria de un Servicio de Medicina Nuclear y adecuar la programación en base a dicha exploración, por lo que se comenzó a utilizar gammacámaras con colimador para paliar estas desventajas.

En los años 90, autores como Merrick32 y Martín-Comín33, publicaron los resultados que obtuvieron al realizar la adquisición con una gammacámara colimada *vs* gammacámara no colimada, y no encontraron diferencias estadísticamente significativas, con la ventaja que supone para la organización del Servicio el poder realizar la exploración con colimador. Más recientemente, Wright y cols34, analizaron el valor de retención de 75SeHCAT con una gammacámara colimada y no colimada en 23 pacientes y lo compararon con un fantoma. Tras realizar un análisis de Wilcoxon, no encontraron diferencias estadísticamente significativas entre ambos métodos (p<0,05) en los estudios con pacientes y con fantomas. Sin embargo, observan que con algunos colimadores el contaje de actividad al 7º día puede ser muy bajo y podría afectar a los pacientes que se encuentran en un valor *borderline* entre normalidad y patológico debido a las variaciones estadísticas, por lo que es fundamental protocolizar la exploración y establecer el mejor colimador. Sus resultados muestran que la técnica con colimador no es idéntica pero si puede ser una alternativa a la técnica sin colimador, con las ventajas que además proporciona.

Protocolo Gammacámara Colimada

En base a los estudios de Martín-Comín y cols33,35, la exploración en una gammacámara colimada debería realizarse en un campo de visión grande (LFOV), con un colimador de agujeros paralelos, baja energía y elevada sensibilidad, centrado en dos ventanas del 20% sobre dos picos de energía del 75Se (136 y 264 KeV). El grupo de Wright lo realiza con ventanas del 10% sobre los mismos picos34.

Algunos autores refieren que en estos pacientes la exploración se debería realizar de cuerpo entero. Sin embargo, si tenemos en cuenta que la reabsorción de los ácidos biliares está prácticamente limitada al íleon terminal y que la circulación enterohepática se localiza en el abdomen, la actividad que podría existir fuera del abdomen sería prácticamente despreciable, por lo que parece razonable que la medida de la actividad de 75SeHCAT se limite al área abdominal, aunque no existen estudios que hayan comparado los resultados de la medida de cuerpo entero *vs* abdomen14,36.

La adquisición del estudio consta de imágenes de fondo que permitan medir la actividad de fondo de la habitación, y de imágenes del paciente, en proyección anterior y posterior. El tiempo de adquisición de cada imagen es de 5 minutos, aunque, en la bibliografía encontramos otras opciones como la de Wright y cols34 que establecen 10 minutos por proyección. Es muy importante posicionar al paciente de forma similar en las dos exploraciones (día 0 y día 7). Para ello, se establece una altura fija de 15 centímetros desde el abdomen del paciente (podemos tomar como referencia el ombligo) al colimador33 (Figura 1).

En resumen, la secuencia de adquisición del estudio es: Fondo de la habitación (Fondo 1), seguido de la medida de la actividad abdominal del paciente y posteriormente se repite la medición de la actividad de fondo de la habitación (Fondo 2) [Figura 2]. Si disponemos de una gammacámara con un sólo detector el tiempo total de adquisición del estudio será de 30 minutos, y con una gammacámara con dos detectores el tiempo se reducirá a la mitad, 15 minutos.

Esta secuencia se realizará de forma similar en el día 0 y en el día 7, siendo fundamental que el primer día el personal de Medicina Nuclear encargado de la exploración deje constancia de las medidas de la gammacámara tanto en proyección anterior como posterior, ya que serán las que se utilicen a la semana siguiente para posicionar al paciente de la misma forma.

*Cálculo de la Retención Abdominal*

El diagnóstico de MAB no se establece de forma visual con las imágenes adquiridas, sino a través del cálculo de la retención abdominal en base a la tasa de cuentas que proporciona cada proyección. La valoración visual nos servirá para constatar los resultados obtenidos (Figura 3).

Para poder analizar la retención abdominal, en primer lugar se realiza el cálculo de la actividad abdominal (AA), que es la media aritmética de la actividad del paciente y la actividad de fondo. AA= (ANT-F1)+(POST-F2)/2, siendo ANT= la actividad del paciente en anterior, POST la actividad del paciente en posterior, F1 la media de fondos en anterior (previo y posterior a la adquisición del paciente) y F2 la media de fondos en posterior (previo y tras la adquisición del paciente). La medición de la AA se realizará tanto en el día 0 como en el día 7.

En segundo lugar, se realizará el cálculo de la retención abdominal (RA) que es el cociente entre la AA al 7º día (AA7) con respecto a la basal (AA0) multiplicado por 100 para poder obtener un porcentaje [RA= (AA7/AA0)*100]29,33,37.

¿Cuál es el porcentaje *cut-off* de RA que permite establecer el valor de normalidad?. En la bibliografía existen dos respuestas a esta pregunta: 10% *vs* 15%. En los primeros estudios publicados se consideraba el valor del 15% realizando una comparación con sujetos normales. Posteriormente en el año 1994, se revisó este valor y se cambió al 10%32. Si se considera una teórica reabsorción anormal de ácidos biliares del 94% en la circulación enterohepática, al 7º día (después de haber transcurrido aproximadamente 35 recirculaciones), el valor que se obtiene es del 10%, por lo que parece razonable considerar que un estudio es normal cuando el porcentaje de RA es > 10%, ya que será poco probable que la MAB sea la causa de una diarrea sintomática severa29.

Además, el grupo de Wedlake4 observó que al analizar la respuesta al tratamiento con colestiramina ésta era superior si establecía el *cut-off* en 10% (80% de respuesta) con respecto al 15% (70% de respuesta), mostrando por tanto el primer valor de corte una mayor especificidad y aplicación clínica.

En base a estos datos, sería prudente considerar el valor del 10% como el *cut-off* más apropiado para el diagnóstico de MAB14.

El problema se plantea cuando el valor de RA se encuentra entre 10-15%. Para un grupo de autores es sinónimo de una RA normal, y para otros es patológico (MAB leve), y probablemente lo que exista en este rango sea una alteración en la absorción de ácidos biliares.

**Tipos de Malabsorción de Ácidos Biliares**

Clásicamente se han establecido tres tipos de malabsorción:

-Tipo I: secundaria a una disfunción ileal.

-Tipo II: cuando existe una condición primaria idiopática. Descrita por primera vez por Pedersen y Thaysen en 1973 y 1976.

-Tipo III: constituido por una serie de condiciones intestinales que interfieren en la fisiología normal de la reabsorción de ácidos biliares19.

*Malabsorción de ácidos biliares Tipo I*

Este grupo está constituido por los pacientes que han sido sometidos a una resección ileal y/o derivación intestinal, así como pacientes con enfermedad de Crohn.

En base al estudio de Ung y cols38, la causa de MAB en pacientes que han sido sometidos a una cirugía ileal podría estar en relación a la pérdida de ASBT tras la intervención, cuya mayor densidad se encuentra en los últimos 100 centímetros ileales desde la válvula ileocecal, reduciéndose así los ácidos biliares que son reabsorbidos y aumentando su pérdida. Además, cuando la resección es superior a 100 cm se produce esteatorrea39.

Al analizar la relación existente entre los centímetros de íleon resecado y la presencia de MAB, Borghede y cols16 observan que es un factor independiente, incluso resecciones inferiores a 10 cm pueden causar MAB. Los resultados de nuestro estudio, realizado a 31 pacientes con enfermedad de Crohn y diarrea crónica, apoyan esta teoría, ya que no encontramos diferencias estadísticamente significativas entre los valores de RA de 75SeHCAT al 7º día y la realización o no de cirugía en estos pacientes, el tipo de cirugía o los centímetros de resección ileal40.

En los pacientes con enfermedad de Crohn activa existe una reducción próxima al 50% de la expresión ileal de ASBT41, que lleva a una deficiente reabsorción de los ácidos biliares. Además, la ulceración de la mucosa ileal afecta también a este proceso. En la bibliografía existen trabajos como los de Neimark42 y Chen43 que analizan cómo la presencia de citocinas proinflamatorias como la IL-1, IL-6 y TNFα inhiben la transcripción del promotor del gen ASBT, provocando una disminución de su expresión en la mucosa ileal. En esta línea Gadaleta y cols44 evidencian una inhibición de la transcripción de FXR a través de citocinas proinflamatorias lo que lleva a una cronificación de la inflamación, ya que una actividad disminuida del FXR conduce a una menor represión de la inflamación. Además, la menor actividad de FXR implica un *feedback* negativo inefectivo sobre la síntesis de ácidos biliares. En estos pacientes también se ha observado una alteración en la microbiota fecal, existiendo una elevada proporción de ácidos biliares primarios y conjugados en heces. Esta alteración va a provocar modificaciones en la composición de los ácidos biliares, pudiendo formar parte del proceso de la inflamación crónica, ya que se perdería el efecto antiinflamatorio de algunos tipos de ácidos biliares14.

En la literatura existen diferentes estudios que analizan la prevalencia de MAB en pacientes con enfermedad de Crohn (con resección ileal y no intervenidos) utilizando como método diagnóstico el 75SeHCAT (*cut-off* RA 10 y 15%). Una selección de estos estudios retrospectivos se recoge en la Tabla 3.

Al analizar los resultados se evidencia que existe una elevada prevalencia de MAB, siendo superior este porcentaje cuando los pacientes son sometidos a una resección ileal (35-80% vs 89-100%). Por ello, determinados autores proponen que no sería necesario realizar el estudio para el diagnóstico de MAB en pacientes con enfermedad de Crohn y resección ileal que presenten diarrea crónica, sino pasar directamente al tratamiento empírico con quelantes de ácidos biliares.

*Malabsorción de ácidos biliares Tipo II*

A este tipo de MAB también se le denomina idiopática o primaria en base a que no se conocía un mecanismo claro que fuese la causa de la diarrea crónica. El diagnóstico se establecía cuando los pacientes presentaban una mucosa ileal indemne, es decir, se había excluido una MAB tipo 1, una MAB tipo 3 (será analizada en el siguiente epígrafe), y los pacientes respondían al tratamiento con quelantes de ácidos biliares. Para algunos autores, se trata de una diarrea crónica funcional, es decir, sin una causa orgánica que la provoque.

Desde hace décadas se ha estudiado la presencia de MAB en pacientes diagnosticados de diarrea funcional o SII con predominio de diarrea. El SII es el trastorno digestivo funcional más frecuente, existiendo una prevalencia en nuestro país del 10%. En base a los criterios diagnósticos clínicos de ROMA III (próximamente serán publicados los de ROMA IV), el paciente debe presentar dolor o molestia abdominal recurrente al menos 3 días por mes en los últimos 3 meses relacionados con dos o más de los siguientes: mejoría con la defecación, comienzo coincidente con un cambio en la frecuencia o en la consistencia de las deposiciones. El SII es muy heterogéneo y sus manifestaciones sintomáticas diversas, por eso, se considera que existen tres subtipos: con predominio de diarrea, con predominio de estreñimiento o de ritmo alterno deposicional50.

En los pacientes con SII con predominio de diarrea aparece una elevada proporción de ácidos biliares primarios en las heces, quizás debido a un tránsito intestinal más acelerado que reduce la posibilidad de que la microbiota intestinal pueda convertir estos ácidos biliares en secundarios, lo que conduce a la aparición de diarrea. Además, en estos pacientes se ha observado un aumento significativo en la síntesis de ácidos biliares, así como una alteración en la microbiota fecal, no quedando claro si es una consecuencia o una causa del tránsito acelerado que presentan14,19.

Durante años se ha asumido que la causa de la MAB idiopática era una alteración en la reabsorción de ácidos biliares en el íleon. Sin embargo, se ha observado que en estos pacientes no disminuye la captación de los ácidos biliares en el íleon y además presentan un aumento en el *pool* total de ácidos biliares, lo que lleva a pensar que pueda existir otra causa que provoque la MAB. El grupo de Walters19 propone la teoría de que en estos pacientes existe un mecanismo de *feedback* negativo alterado con reducción de los niveles séricos de FGF19 y con el consiguiente aumento en los niveles de C4 que activa la síntesis de ácidos biliares.

En el año 2009, el grupo de Wedlake4 realiza una revisión sistemática para establecer la prevalencia de MAB en pacientes con SII con predominio de diarrea, utilizando la gammagrafía con 75SeHCAT como método diagnóstico. El resultado fue que el 32% de los 652 pacientes analizados presentaban una RA < 10% al 7º día, es decir, este porcentaje de pacientes se encontraban mal diagnosticados como SII cuando en realidad lo que presentaban era una MAB. Por tanto, el diagnóstico de diarrea funcional debe realizarse con cautela, ya que en un porcentaje importante de pacientes puede existir una causa orgánica que la justifique.

Recientemente ha sido publicada una revisión sistemática con metaanálisis que analiza la prevalencia de MAB en pacientes con SII y diarrea. Analizan un total de 908 pacientes distribuidos en 6 estudios, 4 de ellos prospectivos, y cuyo método diagnóstico fue la RA de 75SeHCAT al 7º día < 10%. El resultado fue que el 29,3% (rango: 16,9-35,3%) de los pacientes presentaban MAB y si se tienen en cuenta los efectos aleatorios de los diferentes estudios y se aplica un modelo de corrección, esta tasa fue del 28,1% (22,6-34%, intervalo de confianza 95%).

Estos estudios ponen de manifiesto la elevada prevalencia que existe de MAB en pacientes que están diagnosticados de SII con predominio de diarrea. Por tanto, parece razonable realizar un estudio de 75SeHCAT para establecer un diagnóstico adecuado de estos pacientes, ya que va a tener implicaciones en la práctica clínica y en el desarrollo de futuras guías51.

*Malabsorción de ácidos biliares Tipo III*

En este grupo se engloban diferentes patologías con una etiología variada que interfieren en la reabsorción de ácidos biliares. Entre ellas destacan: la existencia de una cirugía previa (colecistectomía, vagotomía), pancreatitis crónica, sobrecrecimiento bacteriano en el intestino delgado, colitis (microscópica, colágena, linfocítica, ulcerosa), enfermedad celíaca, enterítis por radiación o diabetes mellitus19.

El mecanismo de producción de MAB en algunos casos no se encuentra muy bien establecido, pero la consecuencia final son cambios en la fisiología gastrointestinal que llevan a una alteración en la reabsorción de los ácidos biliares.

En la Tabla 4 se exponen cinco estudios retrospectivos recogidos en la revisión sistemática realizada por el grupo de Mottacki14 que analizan la prevalencia de MAB, utilizando como método diagnóstico el 75SeHCAT, en pacientes con diarrea crónica que presentan otras patologías gastrointestinales de forma concomitante. Al analizar los resultados, se observa cómo sus valores oscilan entre el 33% en el caso de colitis microscópica/colágena o enfermedad celíaca y el 36%-100% en el caso de colecistectomía o vagotomía y enteritis por radiación14,16.

En este punto se debe hacer mención a los pacientes con cáncer que han recibido tratamiento quimioterápico y/o radioterápico, en los que los síntomas gastrointestinales son una de las consecuencias más comunes del tratamiento, suponiendo un importante impacto para su calidad de vida. El grupo de Phillips53, en un estudio retrospectivo reciente analizó la presencia de MAB como una posible causa de estos síntomas en 506 pacientes con cáncer urológico, ginecológico, gastrointestinal, hematológico y mama. El diagnóstico lo estableció tras la realización de un estudio con 75SeHCAT, con resultado de MAB en el 42,5% de los pacientes, siendo ésta severa en más del 45%.

Por tanto, la MAB es una causa frecuente de diarrea crónica en los pacientes con cáncer que han recibido tratamiento con quimioterapia y/o radioterapia y que habrá que tener presente en el momento que acudan a la consulta con síntomas gastrointestinales.

**Tratamiento de la malabsorción de ácidos biliares**

El tratamiento de primera línea ante un diagnóstico de MAB es con quelantes, que están cargados positivamente y se unen a los ácidos biliares en el intestino con una elevada afinidad para formar complejos insolubles que son excretados en las heces. El primer uso autorizado de estos fármacos fue como agentes hipolipemiantes. Existen tres quelantes de ácidos biliares comercialmente disponibles: colestiramina, colestipol y, más reciente, colesevelam.

*a) Colestiramina y Colestipol*

Son los fármacos que más comúnmente se usan en esta patología. Se unen preferentemente a los ácidos biliares más hidrofóbicos: quenodesoxicólico y desoxicólico. Su administración es por vía oral, en forma liofilizada o granulada. La principal desventaja es la mala tolerabilidad por parte del paciente pudiendo ocasionar náuseas, estreñimiento, flatulencia, dolor abdominal o distensión y, sobretodo, el mal sabor, provocando que un 25-30% de los pacientes abandone el tratamiento. Además, reducen la disponibilidad de otros agentes y vitaminas solubles en grasa18,19.

En la bibliografía existen diferentes trabajos que analizan la eficacia del tratamiento con colestiramina, utilizando como método diagnóstico el 75SeHCAT. Entre ellos destaca la revisión sistemática realizada por Wilcox y cols18, que evidencia que el 70% de los 559 pacientes analizados (rango 63-100%) responden al tratamiento, existiendo por tanto un 30% de pacientes que no responden, fundamentalmente porque la terapia fue inefectiva (16%) o bien por intolerancia al tratamiento (11%). Wedlake y cols4 constatan que existe una relación entre la severidad de la MAB y la respuesta al tratamiento: 96% en pacientes con MAB severa, 80% en pacientes con MAB moderada y 70% en pacientes con MAB leve. Sin embargo, la revisión más reciente de Wilcox18 no confirma esta relación entre la severidad de la MAB y la respuesta al tratamiento (67% en MAB severa, 73% en MAB moderada y 59% en MAB leve).

*b) Colesevelam*

La diferencia principal con los clásicos quelantes de ácidos biliares es su preferencia por unirse a los ácidos biliares hidrofílicos: ácido cólico. La ventaja más importante de este tratamiento es que su administración es en forma de comprimidos, con una buena tolerabilidad y con una acción más potente asociada a menos efectos secundarios, no afectando a la biodisponibilidad de otros agentes. Sin embargo, el principal problema es que es un hipolipemiante cuyo uso como quelante de ácidos biliares no se encuentra actualmente autorizado, además de su mayor coste18,19.

En la bibliografía existen estudios que analizan la respuesta al tratamiento con colesevelam en primera o segunda línea, después de no haber sido efectivo el tratamiento con los quelantes clásicos. En la revisión sistemática realizada por Wilcox y cols18 existe una respuesta al tratamiento en el 68% de los 90 pacientes analizados. En este sentido, el grupo de Orekoya49 observa un porcentaje de respuesta del 40% cuando se utiliza como tratamiento de primera línea y del 47% como segunda línea (45% pacientes) tras la ineficacia del tratamiento con colestiramina. Además, en la literatura existen estudios como el del grupo de Beigel54 que analiza la respuesta al tratamiento con colesevelam frente a un placebo en 26 pacientes con MAB, observando que el 69,7% de los pacientes tratados con colesevelam y el 27,3% del grupo placebo presentan una reducción de deposiciones líquidas/día superior al 30%, con una mejoría en la consistencia de las heces.

Por tanto, colesevelam puede ser un tratamiento alternativo efectivo a la terapia convencional.

Existen otras opciones de tratamiento en la MAB:

*a)Antidiarréicos convencionales (loperamida)*: actúa como tratamiento sintomático, reduciendo la motilidad colónica y aumentado el tiempo de contacto con la mucosa. No existe bibliografía suficiente que avale su uso, sólo se ha estudiado su efecto en pacientes con enteritis por radiación o con resección ileal. Únicamente se debería considerar cuando no existe respuesta al tratamiento con quelantes de ácidos biliares14,18.

*b)Hidróxido de aluminio*: no se encuentra autorizado su uso para MAB y no existen datos suficientes que lo apoyen. Podría utilizarse como tratamiento de segunda o tercera línea18.

*c)Corticoides de liberación tópica (budesonida)*: aumenta la expresión proteica de ASBT, por lo que, además de mejorar la inflamación de la mucosa aumentaría la absorción de ácidos biliares. Esta teoría se apoya en los resultados obtenidos tras el tratamiento de pacientes con colitis colágena55.

*d)Ácido Obeticólico*: es un agente experimental que inhibe la diarrea a través de mecanismos celulares. Es un potente agonista del FXR, restaurando la producción de FGF19 a través de la inhibición de la síntesis hepática de ácidos biliares. Los primeros estudios se han realizado en pacientes con MAB tipo II con resultados de buena tolerancia, con mejoría en la frecuencia y consistencia de las heces y con la ventaja de que es un tratamiento específico, no como la terapia convencional. Aún no se encuentra disponible en la práctica clínica y son necesarios ensayos randomizados que establezcan su eficacia5,14,18,49.

**Propuesta de algoritmo diagnóstico**

En el año 2003, la Sociedad Británica de Gastroenterología publicó un algoritmo en el que el estudio gammagráfico con 75SeHCAT ocupaba el último escalón en el diagnóstico de la diarrea crónica a pesar de la elevada sensibilidad y especificidad que presentaba56.

En los últimos años, en base a los datos publicados, se ha propuesto un nuevo algoritmo diagnóstico, en el que el estudio de 75SeHCAT ocupa la primera o segunda línea en el manejo de los pacientes con diarrea crónica57. En base a esta publicación nuestro grupo ha elaborado una propuesta de algoritmo presentada en la Figura 4.

En la bibliografía existen estudios como el de Notta y cols37 que analiza la utilidad de 75SeHCAT en el diagnóstico inicial de pacientes con diarrea crónica de más de un mes de evolución y con ausencia de tratamiento previo, con resultado de MAB en el 43,2% de los 37 pacientes estudiados.

Si este resultado es trasladado a la propuesta de algoritmo diagnóstico expuesta previamente, el 75SeHCAT podría sustituir a la colonoscopia en los pacientes en los que se aconseja dicha exploración (sospecha de patología orgánica o en los que las pruebas de laboratorio son anormales), con la consiguiente mejora de la morbilidad que le supone al paciente el cambio de exploración en el diagnóstico inicial.

**Conclusiones**

La MAB es una de las causas de la diarrea crónica cuyo método diagnóstico *gold standard* es la gammagrafía con 75SeHCAT. En la práctica clínica diaria la MAB se encuentra infradiagnosticada, por lo que es fundamental establecer un adecuado algoritmo diagnóstico de la diarrea crónica, en el que el estudio con 75SeHCAT ocupe la primera o segunda línea en el diagnóstico diferencial, permitiendo un tratamiento precoz, con la mejora que supone en la calidad de vida para estos pacientes.

**Agradecimientos**

Al Servicio de Medicina Nuclear del Hospital Universitario de Bellvitge, en especial al Dr. Edel Noriega y al Dr. Oriol Puig, por su colaboración, en base a su experiencia, para el inicio de la exploración con 75SeHCAT en nuestra Unidad.

**Bibliografía**

1.- Schiller LR. Chronic Diarrhea. Gastroenterology 2004; 127: 287-93.

2.- Fine KD, Schiller LR. AGA technical review on the evaluation and management of chronic diarrhea. Gastroenterology 1999; 116: 1464-86.

3.- [Kurien M](https://www.ncbi.nlm.nih.gov/pubmed/?term=Kurien%20M%5BAuthor%5D&cauthor=true&cauthor_uid=24946066), [Chaudhary S](https://www.ncbi.nlm.nih.gov/pubmed/?term=Chaudhary%20S%5BAuthor%5D&cauthor=true&cauthor_uid=24946066), [McConnell JR](https://www.ncbi.nlm.nih.gov/pubmed/?term=McConnell%20JR%5BAuthor%5D&cauthor=true&cauthor_uid=24946066), [Leeds JS](https://www.ncbi.nlm.nih.gov/pubmed/?term=Leeds%20JS%5BAuthor%5D&cauthor=true&cauthor_uid=24946066), [Sanders DS](https://www.ncbi.nlm.nih.gov/pubmed/?term=Sanders%20DS%5BAuthor%5D&cauthor=true&cauthor_uid=24946066). Letter: bile acid malabsorption - what is the prevalence in patients with chronic diarrhoea?. [Aliment Pharmacol Ther](https://www.ncbi.nlm.nih.gov/pubmed/?term=letter%3A+bile+acid+malabsorption-whta+is+the+prevalence+in+patients+with+chronic+diarrhoea%3F) 2014; 40: 215.

4.- [Wedlake L](https://www.ncbi.nlm.nih.gov/pubmed/?term=Wedlake%20L%5BAuthor%5D&cauthor=true&cauthor_uid=19570102)1, [A'Hern R](https://www.ncbi.nlm.nih.gov/pubmed/?term=A'Hern%20R%5BAuthor%5D&cauthor=true&cauthor_uid=19570102), [Russell D](https://www.ncbi.nlm.nih.gov/pubmed/?term=Russell%20D%5BAuthor%5D&cauthor=true&cauthor_uid=19570102), [Thomas K](https://www.ncbi.nlm.nih.gov/pubmed/?term=Thomas%20K%5BAuthor%5D&cauthor=true&cauthor_uid=19570102), [Walters JR](https://www.ncbi.nlm.nih.gov/pubmed/?term=Walters%20JR%5BAuthor%5D&cauthor=true&cauthor_uid=19570102), [Andreyev HJ](https://www.ncbi.nlm.nih.gov/pubmed/?term=Andreyev%20HJ%5BAuthor%5D&cauthor=true&cauthor_uid=19570102). Systematic review: the prevalence of idiopathic bile acid malabsorption as diagnosed by SeHCAT scanning in patients with diarrhoea-predominant irritable bowel syndrome. Aliment Pharmacol Ther 2009; 30: 707-17.

5.- [Camilleri M](https://www.ncbi.nlm.nih.gov/pubmed/?term=Camilleri%20M%5BAuthor%5D&cauthor=true&cauthor_uid=24410472). Advances in understanding of bile acid diarrhea. [Expert Rev Gastroenterol Hepatol](https://www.ncbi.nlm.nih.gov/pubmed/24410472) 2014; 8: 49-61.

6.- [Ung KA](https://www.ncbi.nlm.nih.gov/pubmed/?term=Ung%20KA%5BAuthor%5D&cauthor=true&cauthor_uid=11895458), [Olofsson G](https://www.ncbi.nlm.nih.gov/pubmed/?term=Olofsson%20G%5BAuthor%5D&cauthor=true&cauthor_uid=11895458), [Fae A](https://www.ncbi.nlm.nih.gov/pubmed/?term=Fae%20A%5BAuthor%5D&cauthor=true&cauthor_uid=11895458), [Kilander A](https://www.ncbi.nlm.nih.gov/pubmed/?term=Kilander%20A%5BAuthor%5D&cauthor=true&cauthor_uid=11895458), [Ohlsson C](https://www.ncbi.nlm.nih.gov/pubmed/?term=Ohlsson%20C%5BAuthor%5D&cauthor=true&cauthor_uid=11895458), [Jonsson O](https://www.ncbi.nlm.nih.gov/pubmed/?term=Jonsson%20O%5BAuthor%5D&cauthor=true&cauthor_uid=11895458). In vitro determination of active bile acid absorption in small biopsy specimens obtained endoscopically or surgically from the human intestine. [Eur J Clin Invest](https://www.ncbi.nlm.nih.gov/pubmed/?term=in+vitro+determination+of+active+bile+acid+absorption+in+small+biopsy) 2002; 32: 115-21.

7.- Krag E, Phillips SF. [Active and passive bile acid absorption in man. Perfusion studies of the ileum and jejunum.](https://www.ncbi.nlm.nih.gov/pubmed/4830231) J Clin Invest 1974; 53: 1686-94.

8.- [Pattni S](https://www.ncbi.nlm.nih.gov/pubmed/?term=Pattni%20S%5BAuthor%5D&cauthor=true&cauthor_uid=19900947), [Walters JR](https://www.ncbi.nlm.nih.gov/pubmed/?term=Walters%20JR%5BAuthor%5D&cauthor=true&cauthor_uid=19900947). Recent advances in the understanding of bile acid malabsorption. [Br Med Bull](https://www.ncbi.nlm.nih.gov/pubmed/19900947) 2009; 92: 79-93.

9.- [Peters AM](https://www.ncbi.nlm.nih.gov/pubmed/?term=Peters%20AM%5BAuthor%5D&cauthor=true&cauthor_uid=23740376), [Walters JR](https://www.ncbi.nlm.nih.gov/pubmed/?term=Walters%20JR%5BAuthor%5D&cauthor=true&cauthor_uid=23740376). Recycling rate of bile acids in the enterohepatic recirculation as a major determinant of whole body 75SeHCAT retention. [Eur J Nucl Med Mol Imaging](https://www.ncbi.nlm.nih.gov/pubmed/?term=recycling+rate+of+bile+acids+in+the+enterohepatic+recirculation) 2013; 40: 1618-21.

10.- [Walters JR](http://www.ncbi.nlm.nih.gov/pubmed/?term=Walters%20JR%5BAuthor%5D&cauthor=true&cauthor_uid=19426836), [Tasleem AM](http://www.ncbi.nlm.nih.gov/pubmed/?term=Tasleem%20AM%5BAuthor%5D&cauthor=true&cauthor_uid=19426836), [Omer OS](http://www.ncbi.nlm.nih.gov/pubmed/?term=Omer%20OS%5BAuthor%5D&cauthor=true&cauthor_uid=19426836), [Brydon WG](http://www.ncbi.nlm.nih.gov/pubmed/?term=Brydon%20WG%5BAuthor%5D&cauthor=true&cauthor_uid=19426836), [Dew T](http://www.ncbi.nlm.nih.gov/pubmed/?term=Dew%20T%5BAuthor%5D&cauthor=true&cauthor_uid=19426836), [le Roux CW](http://www.ncbi.nlm.nih.gov/pubmed/?term=le%20Roux%20CW%5BAuthor%5D&cauthor=true&cauthor_uid=19426836). A new mechanism for bile acid diarrhea: defective feedback inhibition of bile acid biosynthesis. [Clin Gastroenterol Hepatol](http://www.ncbi.nlm.nih.gov/pubmed/19426836) 2009; 7: 1189-94.

11.- Islam SI, DiBaise JK. Bile acid: an underrecognized and underappreciated cause of chronic diarrhoea. Pract Gastroenterol 2012; 36: 32-44.

12.- [Ferguson J](https://www.ncbi.nlm.nih.gov/pubmed/?term=Ferguson%20J%5BAuthor%5D&cauthor=true&cauthor_uid=3090133), [Walker K](https://www.ncbi.nlm.nih.gov/pubmed/?term=Walker%20K%5BAuthor%5D&cauthor=true&cauthor_uid=3090133), [Thomson AB](https://www.ncbi.nlm.nih.gov/pubmed/?term=Thomson%20AB%5BAuthor%5D&cauthor=true&cauthor_uid=3090133). Limitations in the use of 14C-glycocholate breath and stool bile acid determinations in patients with chronic diarrhea. [J Clin Gastroenterol](https://www.ncbi.nlm.nih.gov/pubmed/?term=limitations+in+the+use+of+14C-glycocholate+breath+and+stool+bile+acid+determinations) 1986; 8: 258-62.

13.- [Sciarretta G](https://www.ncbi.nlm.nih.gov/pubmed/?term=Sciarretta%20G%5BAuthor%5D&cauthor=true&cauthor_uid=3710057), [Vicini G](https://www.ncbi.nlm.nih.gov/pubmed/?term=Vicini%20G%5BAuthor%5D&cauthor=true&cauthor_uid=3710057), [Fagioli G](https://www.ncbi.nlm.nih.gov/pubmed/?term=Fagioli%20G%5BAuthor%5D&cauthor=true&cauthor_uid=3710057), [Verri A](https://www.ncbi.nlm.nih.gov/pubmed/?term=Verri%20A%5BAuthor%5D&cauthor=true&cauthor_uid=3710057), [Ginevra A](https://www.ncbi.nlm.nih.gov/pubmed/?term=Ginevra%20A%5BAuthor%5D&cauthor=true&cauthor_uid=3710057), [Malaguti P](https://www.ncbi.nlm.nih.gov/pubmed/?term=Malaguti%20P%5BAuthor%5D&cauthor=true&cauthor_uid=3710057). Use of 23-selena-25-homocholyltaurine to detect bile acid malabsorption in patients with illeal dysfunction or diarrhea. [Gastroenterology](https://www.ncbi.nlm.nih.gov/pubmed/?term=Sciarretta+et+al.+Gastroenterology+1986%3B+91%3A+1-9) 1986; 91: 1-9.

14.- [Mottacki N](https://www.ncbi.nlm.nih.gov/pubmed/?term=Mottacki%20N%5BAuthor%5D&cauthor=true&cauthor_uid=26913381), [Simrén M](https://www.ncbi.nlm.nih.gov/pubmed/?term=Simr%C3%A9n%20M%5BAuthor%5D&cauthor=true&cauthor_uid=26913381), [Bajor A](https://www.ncbi.nlm.nih.gov/pubmed/?term=Bajor%20A%5BAuthor%5D&cauthor=true&cauthor_uid=26913381). Review article: bile acid diarrhoea - pathogenesis, diagnosis and management. [Aliment Pharmacol Ther](https://www.ncbi.nlm.nih.gov/pubmed/26913381) 2016; 43: 884-98.

15.- [Williams AJ](https://www.ncbi.nlm.nih.gov/pubmed/?term=Williams%20AJ%5BAuthor%5D&cauthor=true&cauthor_uid=1916479), [Merrick MV](https://www.ncbi.nlm.nih.gov/pubmed/?term=Merrick%20MV%5BAuthor%5D&cauthor=true&cauthor_uid=1916479), [Eastwood MA](https://www.ncbi.nlm.nih.gov/pubmed/?term=Eastwood%20MA%5BAuthor%5D&cauthor=true&cauthor_uid=1916479). Idiopathic bile acid malabsorption--a review of clinical presentation, diagnosis, and response to treatment. [Gut.](https://www.ncbi.nlm.nih.gov/pubmed/?term=william.+gut+1991%3B+31%3A+1004-6) 1991; 32: 1004-6.

16.- [Borghede MK](https://www.ncbi.nlm.nih.gov/pubmed/?term=Borghede%20MK%5BAuthor%5D&cauthor=true&cauthor_uid=22075299), [Schlütter JM](https://www.ncbi.nlm.nih.gov/pubmed/?term=Schl%C3%BCtter%20JM%5BAuthor%5D&cauthor=true&cauthor_uid=22075299), [Agnholt JS](https://www.ncbi.nlm.nih.gov/pubmed/?term=Agnholt%20JS%5BAuthor%5D&cauthor=true&cauthor_uid=22075299), [Christensen LA](https://www.ncbi.nlm.nih.gov/pubmed/?term=Christensen%20LA%5BAuthor%5D&cauthor=true&cauthor_uid=22075299), [Gormsen LC](https://www.ncbi.nlm.nih.gov/pubmed/?term=Gormsen%20LC%5BAuthor%5D&cauthor=true&cauthor_uid=22075299), [Dahlerup JF](https://www.ncbi.nlm.nih.gov/pubmed/?term=Dahlerup%20JF%5BAuthor%5D&cauthor=true&cauthor_uid=22075299). Bile acid malabsorption investigated by selenium-75-homocholic acid taurine ((75)SeHCAT) scans: causes and treatment responses to cholestyramine in 298 patients with chronic watery diarrhoea. [Eur J Intern Med](https://www.ncbi.nlm.nih.gov/pubmed/?term=borghede.+Eur+j+Int+Med+2011%3A+22%3A+e137-40) 2011; 22: e137-40.

17.- [Pattni SS](https://www.ncbi.nlm.nih.gov/pubmed/?term=Pattni%20SS%5BAuthor%5D&cauthor=true&cauthor_uid=23238290), [Brydon WG](https://www.ncbi.nlm.nih.gov/pubmed/?term=Brydon%20WG%5BAuthor%5D&cauthor=true&cauthor_uid=23238290), [Dew T](https://www.ncbi.nlm.nih.gov/pubmed/?term=Dew%20T%5BAuthor%5D&cauthor=true&cauthor_uid=23238290), [Walters JR](https://www.ncbi.nlm.nih.gov/pubmed/?term=Walters%20JR%5BAuthor%5D&cauthor=true&cauthor_uid=23238290). Fibroblast Growth Factor 19 and 7α-Hydroxy-4-Cholesten-3-one in the Diagnosis of Patients With Possible Bile Acid Diarrhea. [Clin Transl Gastroenterol](https://www.ncbi.nlm.nih.gov/pubmed/?term=Pattini+et+all.+Clin+Transl+Gastroenterol+2012%3B+3%3A+e18) 2012; 3: e18.

18.- [Wilcox C](https://www.ncbi.nlm.nih.gov/pubmed/?term=Wilcox%20C%5BAuthor%5D&cauthor=true&cauthor_uid=24602022), [Turner J](https://www.ncbi.nlm.nih.gov/pubmed/?term=Turner%20J%5BAuthor%5D&cauthor=true&cauthor_uid=24602022), [Green J](https://www.ncbi.nlm.nih.gov/pubmed/?term=Green%20J%5BAuthor%5D&cauthor=true&cauthor_uid=24602022). Systematic review: the management of chronic diarrhoea due to bile acid malabsorption. [Aliment Pharmacol Ther](https://www.ncbi.nlm.nih.gov/pubmed/?term=Aliment+Pharmacol+Ther+2014%3B+39%3A+923-939) 2014; 39: 923-39.

19.- [Walters JR](https://www.ncbi.nlm.nih.gov/pubmed/?term=Walters%20JR%5BAuthor%5D&cauthor=true&cauthor_uid=21180614), [Pattni SS](https://www.ncbi.nlm.nih.gov/pubmed/?term=Pattni%20SS%5BAuthor%5D&cauthor=true&cauthor_uid=21180614). Managing bile acid diarrhoea. [Therap Adv Gastroenterol](https://www.ncbi.nlm.nih.gov/pubmed/21180614) 2010; 3: 349-57.

20.- [Camilleri M](https://www.ncbi.nlm.nih.gov/pubmed/?term=Camilleri%20M%5BAuthor%5D&cauthor=true&cauthor_uid=19368662), [Nadeau A](https://www.ncbi.nlm.nih.gov/pubmed/?term=Nadeau%20A%5BAuthor%5D&cauthor=true&cauthor_uid=19368662), [Tremaine WJ](https://www.ncbi.nlm.nih.gov/pubmed/?term=Tremaine%20WJ%5BAuthor%5D&cauthor=true&cauthor_uid=19368662), [Lamsam J](https://www.ncbi.nlm.nih.gov/pubmed/?term=Lamsam%20J%5BAuthor%5D&cauthor=true&cauthor_uid=19368662), [Burton D](https://www.ncbi.nlm.nih.gov/pubmed/?term=Burton%20D%5BAuthor%5D&cauthor=true&cauthor_uid=19368662) and [Odunsi S](https://www.ncbi.nlm.nih.gov/pubmed/?term=Odunsi%20S%5BAuthor%5D&cauthor=true&cauthor_uid=19368662). Measurement of serum 7alpha-hydroxy-4-cholesten-3-one (or 7alphaC4), a surrogate test for bile acid malabsorption in health, ileal disease and irritable bowel syndrome using liquid chromatography-tandem mass spectrometry. [Neurogastroenterol Motil](https://www.ncbi.nlm.nih.gov/pubmed/?term=neurogastreoenterol+motil+2009%3B+21%3A+734-e43) 2009; 21: 734-e43.

21.- [Bajor A](https://www.ncbi.nlm.nih.gov/pubmed/?term=Bajor%20A%5BAuthor%5D&cauthor=true&cauthor_uid=24727487), [Törnblom H](https://www.ncbi.nlm.nih.gov/pubmed/?term=T%C3%B6rnblom%20H%5BAuthor%5D&cauthor=true&cauthor_uid=24727487), [Rudling M](https://www.ncbi.nlm.nih.gov/pubmed/?term=Rudling%20M%5BAuthor%5D&cauthor=true&cauthor_uid=24727487), [Ung KA](https://www.ncbi.nlm.nih.gov/pubmed/?term=Ung%20KA%5BAuthor%5D&cauthor=true&cauthor_uid=24727487), [Simrén M](https://www.ncbi.nlm.nih.gov/pubmed/?term=Simr%C3%A9n%20M%5BAuthor%5D&cauthor=true&cauthor_uid=24727487). Increased colonic bile acid exposure: a relevant factor for symptoms and treatment in IBS. [Gut](https://www.ncbi.nlm.nih.gov/pubmed/?term=Bajor+et+al.+Gut+2015%3B+64%3A+84-92) 2015; 64: 84-92.

22.- [Thaysen EH](https://www.ncbi.nlm.nih.gov/pubmed/?term=Thaysen%20EH%5BAuthor%5D&cauthor=true&cauthor_uid=7117906), [Orholm M](https://www.ncbi.nlm.nih.gov/pubmed/?term=Orholm%20M%5BAuthor%5D&cauthor=true&cauthor_uid=7117906), [Arnfred T](https://www.ncbi.nlm.nih.gov/pubmed/?term=Arnfred%20T%5BAuthor%5D&cauthor=true&cauthor_uid=7117906), [Carl J](https://www.ncbi.nlm.nih.gov/pubmed/?term=Carl%20J%5BAuthor%5D&cauthor=true&cauthor_uid=7117906), [Rødbro P](https://www.ncbi.nlm.nih.gov/pubmed/?term=R%C3%B8dbro%20P%5BAuthor%5D&cauthor=true&cauthor_uid=7117906). Assessment of ileal function by abdominal counting of the retention of a gamma emitting bile acid analogue. [Gut](https://www.ncbi.nlm.nih.gov/pubmed/?term=tahysen.+Gut+1982%3B+23%3A+862) 1982; 23: 862-5.

23.- [Boyd GS](https://www.ncbi.nlm.nih.gov/pubmed/?term=Boyd%20GS%5BAuthor%5D&cauthor=true&cauthor_uid=7264761), [Merrick MV](https://www.ncbi.nlm.nih.gov/pubmed/?term=Merrick%20MV%5BAuthor%5D&cauthor=true&cauthor_uid=7264761), [Monks R](https://www.ncbi.nlm.nih.gov/pubmed/?term=Monks%20R%5BAuthor%5D&cauthor=true&cauthor_uid=7264761), [Thomas IL](https://www.ncbi.nlm.nih.gov/pubmed/?term=Thomas%20IL%5BAuthor%5D&cauthor=true&cauthor_uid=7264761). Se-75-labeled bile acid analogs, new radiopharmaceuticals for investigating the enterohepatic circulation. [J Nucl Med](https://www.ncbi.nlm.nih.gov/pubmed/?term=boyd.+J+Nucl+Med+1981%3B+22%3A+720-5) 1981; 22: 720-5.

24.- [Soundy RG](https://www.ncbi.nlm.nih.gov/pubmed/?term=Soundy%20RG%5BAuthor%5D&cauthor=true&cauthor_uid=6799623), [Simpson JD](https://www.ncbi.nlm.nih.gov/pubmed/?term=Simpson%20JD%5BAuthor%5D&cauthor=true&cauthor_uid=6799623), [Ross HM](https://www.ncbi.nlm.nih.gov/pubmed/?term=Ross%20HM%5BAuthor%5D&cauthor=true&cauthor_uid=6799623), [Merrick MV](https://www.ncbi.nlm.nih.gov/pubmed/?term=Merrick%20MV%5BAuthor%5D&cauthor=true&cauthor_uid=6799623). Absorbed dose to man from the Se-75 labeled conjugated bile salt SeHCAT: concise communication. [J Nucl Med](https://www.ncbi.nlm.nih.gov/pubmed/?term=sounday.+J+Nucl+Med+1982%3B+23%3A+157-61) 1982; 23: 157-61.

25.- [Merrick MV](https://www.ncbi.nlm.nih.gov/pubmed/?term=Merrick%20MV%5BAuthor%5D&cauthor=true&cauthor_uid=7057253), [Eastwood MA](https://www.ncbi.nlm.nih.gov/pubmed/?term=Eastwood%20MA%5BAuthor%5D&cauthor=true&cauthor_uid=7057253), [Anderson JR](https://www.ncbi.nlm.nih.gov/pubmed/?term=Anderson%20JR%5BAuthor%5D&cauthor=true&cauthor_uid=7057253), [Ross HM](https://www.ncbi.nlm.nih.gov/pubmed/?term=Ross%20HM%5BAuthor%5D&cauthor=true&cauthor_uid=7057253). Enterohepatic circulation in man of a gamma-emitting bile-acid conjugate, 23-selena-25-homotaurocholic acid (SeHCAT). [J Nucl Med](https://www.ncbi.nlm.nih.gov/pubmed/?term=merrick.+J+nucl+med+1982%3B+23%3A+126-130) 1982; 23: 126-30.

26.- [Merrick MV](https://www.ncbi.nlm.nih.gov/pubmed/?term=Merrick%20MV%5BAuthor%5D&cauthor=true&cauthor_uid=3918708), [Eastwood MA](https://www.ncbi.nlm.nih.gov/pubmed/?term=Eastwood%20MA%5BAuthor%5D&cauthor=true&cauthor_uid=3918708), [Ford MJ](https://www.ncbi.nlm.nih.gov/pubmed/?term=Ford%20MJ%5BAuthor%5D&cauthor=true&cauthor_uid=3918708). Is bile acid malabsorption underdiagnosed? An evaluation of accuracy of diagnosis by measurement of SeHCAT retention. [Br Med J (Clin Res Ed)](https://www.ncbi.nlm.nih.gov/pubmed/?term=merrick.+British+Medical+Journal+1985%3B+290%3A+665-669) 1985; 290: 665-8.

27.- [Puleston J](https://www.ncbi.nlm.nih.gov/pubmed/?term=Puleston%20J%5BAuthor%5D&cauthor=true&cauthor_uid=15711000), [Morgan H](https://www.ncbi.nlm.nih.gov/pubmed/?term=Morgan%20H%5BAuthor%5D&cauthor=true&cauthor_uid=15711000), [Andreyev J](https://www.ncbi.nlm.nih.gov/pubmed/?term=Andreyev%20J%5BAuthor%5D&cauthor=true&cauthor_uid=15711000). New treatment for bile salt malabsorption. [Gut](https://www.ncbi.nlm.nih.gov/pubmed/?term=Puleston.+Gut+2005%3B+54%3A+441-442) 2005; 54: 441-2.

28.- [Pattni S](https://www.ncbi.nlm.nih.gov/pubmed/?term=Pattni%20S%5BAuthor%5D&cauthor=true&cauthor_uid=19900947), [Walters JR](https://www.ncbi.nlm.nih.gov/pubmed/?term=Walters%20JR%5BAuthor%5D&cauthor=true&cauthor_uid=19900947). Recent advances in the understanding of bile acid malabsorption. [Br Med Bull](https://www.ncbi.nlm.nih.gov/pubmed/?term=pattni.+Br+Med+Bull+2009%3B+92%3A+79-93) 2009; 92: 79-93.

29.- [Notghi A](https://www.ncbi.nlm.nih.gov/pubmed/?term=Notghi%20A%5BAuthor%5D&cauthor=true&cauthor_uid=21876407), [O'Brien J](https://www.ncbi.nlm.nih.gov/pubmed/?term=O'Brien%20J%5BAuthor%5D&cauthor=true&cauthor_uid=21876407), [Low CS](https://www.ncbi.nlm.nih.gov/pubmed/?term=Low%20CS%5BAuthor%5D&cauthor=true&cauthor_uid=21876407), [Thomson W](https://www.ncbi.nlm.nih.gov/pubmed/?term=Thomson%20W%5BAuthor%5D&cauthor=true&cauthor_uid=21876407). Measuring SeHCAT retention: a technical note. [Nucl Med Commun](https://www.ncbi.nlm.nih.gov/pubmed/?term=measurig+SeHCAT+retention%3A+a+tevhnical+note) 2011; 32: 960-6.

30.- [Valdés Olmos R](https://www.ncbi.nlm.nih.gov/pubmed/?term=Vald%C3%A9s%20Olmos%20R%5BAuthor%5D&cauthor=true&cauthor_uid=1936043), [den Hartog Jager F](https://www.ncbi.nlm.nih.gov/pubmed/?term=den%20Hartog%20Jager%20F%5BAuthor%5D&cauthor=true&cauthor_uid=1936043), [Hoefnagel C](https://www.ncbi.nlm.nih.gov/pubmed/?term=Hoefnagel%20C%5BAuthor%5D&cauthor=true&cauthor_uid=1936043), [Taal B](https://www.ncbi.nlm.nih.gov/pubmed/?term=Taal%20B%5BAuthor%5D&cauthor=true&cauthor_uid=1936043). Effect of loperamide and delay of bowel motility on bile acid malabsorption caused by late radiation damage and ileal resection. [Eur J Nucl Med](https://www.ncbi.nlm.nih.gov/pubmed/?term=Valdes+olmos.+Eur+J+Nucl+Med+1991%3B+18%3A+346-350) 1991; 18: 346-50.

31.- [Hames TK](https://www.ncbi.nlm.nih.gov/pubmed/?term=Hames%20TK%5BAuthor%5D&cauthor=true&cauthor_uid=6428505), [Condon BR](https://www.ncbi.nlm.nih.gov/pubmed/?term=Condon%20BR%5BAuthor%5D&cauthor=true&cauthor_uid=6428505), [Fleming JS](https://www.ncbi.nlm.nih.gov/pubmed/?term=Fleming%20JS%5BAuthor%5D&cauthor=true&cauthor_uid=6428505), [Phillips G](https://www.ncbi.nlm.nih.gov/pubmed/?term=Phillips%20G%5BAuthor%5D&cauthor=true&cauthor_uid=6428505), [Holdstock G](https://www.ncbi.nlm.nih.gov/pubmed/?term=Holdstock%20G%5BAuthor%5D&cauthor=true&cauthor_uid=6428505), [Smith CL](https://www.ncbi.nlm.nih.gov/pubmed/?term=Smith%20CL%5BAuthor%5D&cauthor=true&cauthor_uid=6428505), et al. A comparison between the use of a shadow shield whole body counter and an uncollimated gamma camera ain the assessment of the seven-day retention of SeHCAT. [Br J Radiol](https://www.ncbi.nlm.nih.gov/pubmed/?term=hames.+BJR+1984%3B+57%3A+581-584) 1984; 57: 581-4.

32.- [Merrick MV](https://www.ncbi.nlm.nih.gov/pubmed/?term=Merrick%20MV%5BAuthor%5D&cauthor=true&cauthor_uid=7995294). Gall-bladder and colonic retention of SeHCAT: a re-evaluation. [Eur J Nucl Med](https://www.ncbi.nlm.nih.gov/pubmed/?term=merrick.+Eur+J+Nucl+Med+1994%3B+21%3A+988-990) 1994; 21: 988-90.

33.-Martín-Comín J, Bonnin D, Baliellas C, Roca M, Xiol y Ricart X, Puchal R, et al. Medición de la función ileal con 75Se-SeHCAT, utilizando una gammacámara colimada, en pacientes con enfermedad inflamatoria intestinal. Rev Esp Med Nuclear 1990; 9: 91-5.

34.- [Wright JW](https://www.ncbi.nlm.nih.gov/pubmed/?term=Wright%20JW%5BAuthor%5D&cauthor=true&cauthor_uid=23604224), [Lovell LA](https://www.ncbi.nlm.nih.gov/pubmed/?term=Lovell%20LA%5BAuthor%5D&cauthor=true&cauthor_uid=23604224), [Gemmell HG](https://www.ncbi.nlm.nih.gov/pubmed/?term=Gemmell%20HG%5BAuthor%5D&cauthor=true&cauthor_uid=23604224), [McKiddie F](https://www.ncbi.nlm.nih.gov/pubmed/?term=McKiddie%20F%5BAuthor%5D&cauthor=true&cauthor_uid=23604224), [Staff RT](https://www.ncbi.nlm.nih.gov/pubmed/?term=Staff%20RT%5BAuthor%5D&cauthor=true&cauthor_uid=23604224). SeHCAT retention values as measured with a collimated and an uncollimated gamma camera: a method comparison study. [Nucl Med Commun](https://www.ncbi.nlm.nih.gov/pubmed/?term=Wright+et+al.+Nucl+Med+Communications+2013%3B+34%3A+718-721) 2013; 34: 718-21.

35.- [Martin-Comin J](https://www.ncbi.nlm.nih.gov/pubmed/?term=Martin-Comin%20J%5BAuthor%5D&cauthor=true&cauthor_uid=8925864), [de Lima Ramos PA](https://www.ncbi.nlm.nih.gov/pubmed/?term=de%20Lima%20Ramos%20PA%5BAuthor%5D&cauthor=true&cauthor_uid=8925864). Performing the 75SeHCAT test using a collimated gamma camera. [Eur J Nucl Med](https://www.ncbi.nlm.nih.gov/pubmed/?term=Performing+the+75SeHCAT+test+using+a+collimated+gamma+camera) 1996; 23: 729.

36.- [Martin-Comin J](https://www.ncbi.nlm.nih.gov/pubmed/?term=Martin-Comin%20J%5BAuthor%5D&cauthor=true&cauthor_uid=22395033), [Guardiola J](https://www.ncbi.nlm.nih.gov/pubmed/?term=Guardiola%20J%5BAuthor%5D&cauthor=true&cauthor_uid=22395033). Measuring SeHCAT retention: the use of a collimated gamma camera. [Nucl Med Commun](https://www.ncbi.nlm.nih.gov/pubmed/22395033) 2012; 33: 521.

37.- [Notta PC](https://www.ncbi.nlm.nih.gov/pubmed/?term=Notta%20PC%5BAuthor%5D&cauthor=true&cauthor_uid=21524824), [Ramal D](https://www.ncbi.nlm.nih.gov/pubmed/?term=Ramal%20D%5BAuthor%5D&cauthor=true&cauthor_uid=21524824), [Maisterra S](https://www.ncbi.nlm.nih.gov/pubmed/?term=Maisterra%20S%5BAuthor%5D&cauthor=true&cauthor_uid=21524824), [Rodríguez Gasen A](https://www.ncbi.nlm.nih.gov/pubmed/?term=Rodr%C3%ADguez%20Gasen%20A%5BAuthor%5D&cauthor=true&cauthor_uid=21524824), [Maymó S](https://www.ncbi.nlm.nih.gov/pubmed/?term=Maym%C3%B3%20S%5BAuthor%5D&cauthor=true&cauthor_uid=21524824), [Sabaté A](https://www.ncbi.nlm.nih.gov/pubmed/?term=Sabat%C3%A9%20A%5BAuthor%5D&cauthor=true&cauthor_uid=21524824), et al. Medición de la absorción de los ácidos biliares en el diagnóstico inicial de la diarrea crónica. [Rev Esp Med Nucl](https://www.ncbi.nlm.nih.gov/pubmed/?term=notta.+Rev+Esp+Med+Nucl+2011%3B+30%3A+297-300." \o "Revista española de medicina nuclear.) 2011; 30: 297-300.

38.- [Ung KA](http://www.ncbi.nlm.nih.gov/pubmed/?term=Ung%20KA%5BAuthor%5D&cauthor=true&cauthor_uid=11895458), [Olofsson G](http://www.ncbi.nlm.nih.gov/pubmed/?term=Olofsson%20G%5BAuthor%5D&cauthor=true&cauthor_uid=11895458), [Fae A](http://www.ncbi.nlm.nih.gov/pubmed/?term=Fae%20A%5BAuthor%5D&cauthor=true&cauthor_uid=11895458), [Kilander A](http://www.ncbi.nlm.nih.gov/pubmed/?term=Kilander%20A%5BAuthor%5D&cauthor=true&cauthor_uid=11895458), [Ohlsson C](http://www.ncbi.nlm.nih.gov/pubmed/?term=Ohlsson%20C%5BAuthor%5D&cauthor=true&cauthor_uid=11895458), [Jonsson O](http://www.ncbi.nlm.nih.gov/pubmed/?term=Jonsson%20O%5BAuthor%5D&cauthor=true&cauthor_uid=11895458). In vitro determination of active bile acid absorption in small biopsy specimens obtained endoscopically or surgically from the human intestine. [Eur J Clin Invest](http://www.ncbi.nlm.nih.gov/pubmed/?term=ung.+Eur+J+Clin+Invest+2002%3B+32%3A+115-21) 2002; 32: 115-21.

39.- [Poley JR](http://www.ncbi.nlm.nih.gov/pubmed/?term=Poley%20JR%5BAuthor%5D&cauthor=true&cauthor_uid=6360), [Hofmann AF](http://www.ncbi.nlm.nih.gov/pubmed/?term=Hofmann%20AF%5BAuthor%5D&cauthor=true&cauthor_uid=6360). Role of fat maldigestion in pathogenesis of steatorrhea in ileal resection. Fat digestion after two sequential test meals with and without cholestyramine. [Gastroenterology](http://www.ncbi.nlm.nih.gov/pubmed/?term=poley.+Gastroenterology+1976%3B+71%3A+38-44) 1976; 71: 38-44.

40.- Mena Bares LM, Maza Muret FR, Carmona Asenjo E, Moreno Ortega E, Guiote Moreno MV, Iglesias Flores E, et al. Value of 75SeHCAT in the diagnosis of bile acid malabsorption in Crohn´s disease with chronic diarrhoea. (Comunicación aceptada en EUROPEAN NUCLEAR MEDICINE CONGRESS 2016 Barcelona, 15-19 de octubre).

41.- [Jung D](http://www.ncbi.nlm.nih.gov/pubmed/?term=Jung%20D%5BAuthor%5D&cauthor=true&cauthor_uid=14684580), [Fantin AC](http://www.ncbi.nlm.nih.gov/pubmed/?term=Fantin%20AC%5BAuthor%5D&cauthor=true&cauthor_uid=14684580), [Scheurer U](http://www.ncbi.nlm.nih.gov/pubmed/?term=Scheurer%20U%5BAuthor%5D&cauthor=true&cauthor_uid=14684580), [Fried M](http://www.ncbi.nlm.nih.gov/pubmed/?term=Fried%20M%5BAuthor%5D&cauthor=true&cauthor_uid=14684580), [Kullak-Ublick GA](http://www.ncbi.nlm.nih.gov/pubmed/?term=Kullak-Ublick%20GA%5BAuthor%5D&cauthor=true&cauthor_uid=14684580). Human ileal bile acid transporter gene ASBT (SLC10A2) is transactivated by the glucocorticoid receptor. [Gut](http://www.ncbi.nlm.nih.gov/pubmed/?term=jung.+Gut+2004%3B+53%3A+78-84) 2004; 53: 78-84.

42.- Neimark E, Chen F, Li X, Magid MS, Alasio TM, Frankenberg T, et al. c-Fos is a critical mediator of inflammatory-mediated repression of the apical sodium-dependent bile acid transporter. Gastroenterology 2006; 131: 554-67.

43.- [Chen F](http://www.ncbi.nlm.nih.gov/pubmed/?term=Chen%20F%5BAuthor%5D&cauthor=true&cauthor_uid=12454857), [Ma L](http://www.ncbi.nlm.nih.gov/pubmed/?term=Ma%20L%5BAuthor%5D&cauthor=true&cauthor_uid=12454857), [Sartor RB](http://www.ncbi.nlm.nih.gov/pubmed/?term=Sartor%20RB%5BAuthor%5D&cauthor=true&cauthor_uid=12454857), [Li F](http://www.ncbi.nlm.nih.gov/pubmed/?term=Li%20F%5BAuthor%5D&cauthor=true&cauthor_uid=12454857), [Xiong H](http://www.ncbi.nlm.nih.gov/pubmed/?term=Xiong%20H%5BAuthor%5D&cauthor=true&cauthor_uid=12454857), [Sun AQ](http://www.ncbi.nlm.nih.gov/pubmed/?term=Sun%20AQ%5BAuthor%5D&cauthor=true&cauthor_uid=12454857), et al. Inflammatory-mediated repression of the rat ileal sodium-dependent bile acid transporter by c-fos nuclear translocation. [Gastroenterology](http://www.ncbi.nlm.nih.gov/pubmed/?term=Chen.+Gastroenterology+2002%3B+123%3A+2005-16) 2002; 123: 2005-16.

44.- [Gadaleta RM](http://www.ncbi.nlm.nih.gov/pubmed/?term=Gadaleta%20RM%5BAuthor%5D&cauthor=true&cauthor_uid=21540105), [Oldenburg B](http://www.ncbi.nlm.nih.gov/pubmed/?term=Oldenburg%20B%5BAuthor%5D&cauthor=true&cauthor_uid=21540105), [Willemsen EC](http://www.ncbi.nlm.nih.gov/pubmed/?term=Willemsen%20EC%5BAuthor%5D&cauthor=true&cauthor_uid=21540105), [Spit M](http://www.ncbi.nlm.nih.gov/pubmed/?term=Spit%20M%5BAuthor%5D&cauthor=true&cauthor_uid=21540105), [Murzilli S](http://www.ncbi.nlm.nih.gov/pubmed/?term=Murzilli%20S%5BAuthor%5D&cauthor=true&cauthor_uid=21540105), [Salvatore L](http://www.ncbi.nlm.nih.gov/pubmed/?term=Salvatore%20L%5BAuthor%5D&cauthor=true&cauthor_uid=21540105), et al. Activation of bile salt nuclear receptor FXR is repressed by pro-inflammatory cytokines activating NF-κB signaling in the intestine. Biochim Biophys Acta 2011; 1812: 851-8.

45.- [Nyhlin H](http://www.ncbi.nlm.nih.gov/pubmed/?term=Nyhlin%20H%5BAuthor%5D&cauthor=true&cauthor_uid=8307458), [Merrick MV](http://www.ncbi.nlm.nih.gov/pubmed/?term=Merrick%20MV%5BAuthor%5D&cauthor=true&cauthor_uid=8307458), [Eastwood MA](http://www.ncbi.nlm.nih.gov/pubmed/?term=Eastwood%20MA%5BAuthor%5D&cauthor=true&cauthor_uid=8307458). Bile acid malabsorption in Crohn's disease and indications for its assessment using SeHCAT. [Gut](http://www.ncbi.nlm.nih.gov/pubmed/?term=nyhlin.+Gut+1994%3B+35%3A+90-3) 1994; 35: 90-3.

46.- [Smith MJ](http://www.ncbi.nlm.nih.gov/pubmed/?term=Smith%20MJ%5BAuthor%5D&cauthor=true&cauthor_uid=11077656), [Cherian P](http://www.ncbi.nlm.nih.gov/pubmed/?term=Cherian%20P%5BAuthor%5D&cauthor=true&cauthor_uid=11077656), [Raju GS](http://www.ncbi.nlm.nih.gov/pubmed/?term=Raju%20GS%5BAuthor%5D&cauthor=true&cauthor_uid=11077656), [Dawson BF](http://www.ncbi.nlm.nih.gov/pubmed/?term=Dawson%20BF%5BAuthor%5D&cauthor=true&cauthor_uid=11077656), [Mahon S](http://www.ncbi.nlm.nih.gov/pubmed/?term=Mahon%20S%5BAuthor%5D&cauthor=true&cauthor_uid=11077656), [Bardhan KD](http://www.ncbi.nlm.nih.gov/pubmed/?term=Bardhan%20KD%5BAuthor%5D&cauthor=true&cauthor_uid=11077656). Bile acid malabsorption in persistent diarrhoea. [J R Coll Physicians Lond](http://www.ncbi.nlm.nih.gov/pubmed/?term=smith.+j+r+coll+ohysicians+lond+2000%3B+34%3A+448) 2000; 34: 448-51.

47.- [Kurien M](http://www.ncbi.nlm.nih.gov/pubmed/?term=Kurien%20M%5BAuthor%5D&cauthor=true&cauthor_uid=21492055), [Evans KE](http://www.ncbi.nlm.nih.gov/pubmed/?term=Evans%20KE%5BAuthor%5D&cauthor=true&cauthor_uid=21492055), [Leeds JS](http://www.ncbi.nlm.nih.gov/pubmed/?term=Leeds%20JS%5BAuthor%5D&cauthor=true&cauthor_uid=21492055), [Hopper AD](http://www.ncbi.nlm.nih.gov/pubmed/?term=Hopper%20AD%5BAuthor%5D&cauthor=true&cauthor_uid=21492055), [Harris A](http://www.ncbi.nlm.nih.gov/pubmed/?term=Harris%20A%5BAuthor%5D&cauthor=true&cauthor_uid=21492055), [Sanders DS](http://www.ncbi.nlm.nih.gov/pubmed/?term=Sanders%20DS%5BAuthor%5D&cauthor=true&cauthor_uid=21492055). Bile acid malabsorption: an under-investigated differential diagnosis in patients presenting with diarrhea predominant irritable bowel syndrome type symptoms. [Scand J Gastroenterol](http://www.ncbi.nlm.nih.gov/pubmed/?term=bile+acid+malabsorption%3A+an+underinvestigated+diferential+diagnosis+in+patients+presenting+with+diarrhea+predominant) 2011; 46: 818-22.

48.- [Gracie DJ](http://www.ncbi.nlm.nih.gov/pubmed/?term=Gracie%20DJ%5BAuthor%5D&cauthor=true&cauthor_uid=22765392), [Kane JS](http://www.ncbi.nlm.nih.gov/pubmed/?term=Kane%20JS%5BAuthor%5D&cauthor=true&cauthor_uid=22765392), [Mumtaz S](http://www.ncbi.nlm.nih.gov/pubmed/?term=Mumtaz%20S%5BAuthor%5D&cauthor=true&cauthor_uid=22765392), [Scarsbrook AF](http://www.ncbi.nlm.nih.gov/pubmed/?term=Scarsbrook%20AF%5BAuthor%5D&cauthor=true&cauthor_uid=22765392), [Chowdhury FU](http://www.ncbi.nlm.nih.gov/pubmed/?term=Chowdhury%20FU%5BAuthor%5D&cauthor=true&cauthor_uid=22765392), [Ford AC](http://www.ncbi.nlm.nih.gov/pubmed/?term=Ford%20AC%5BAuthor%5D&cauthor=true&cauthor_uid=22765392). Prevalence of, and predictors of, bile acid malabsorption in outpatients with chronic diarrhea. [Neurogastroenterol Motil](http://www.ncbi.nlm.nih.gov/pubmed/?term=Gracie.+Neurogastroenterol+Motil+2012%3B+24%3A+983-e538) 2012; 24: 983-e538.

49.- [Orekoya O](http://www.ncbi.nlm.nih.gov/pubmed/?term=Orekoya%20O%5BAuthor%5D&cauthor=true&cauthor_uid=26031975), [McLaughlin J](http://www.ncbi.nlm.nih.gov/pubmed/?term=McLaughlin%20J%5BAuthor%5D&cauthor=true&cauthor_uid=26031975), [Leitao E](http://www.ncbi.nlm.nih.gov/pubmed/?term=Leitao%20E%5BAuthor%5D&cauthor=true&cauthor_uid=26031975), [Johns W](http://www.ncbi.nlm.nih.gov/pubmed/?term=Johns%20W%5BAuthor%5D&cauthor=true&cauthor_uid=26031975), [Lal S](http://www.ncbi.nlm.nih.gov/pubmed/?term=Lal%20S%5BAuthor%5D&cauthor=true&cauthor_uid=26031975), [Paine P](http://www.ncbi.nlm.nih.gov/pubmed/?term=Paine%20P%5BAuthor%5D&cauthor=true&cauthor_uid=26031975). Quantifying bile acid malabsorption helps predict response and tailor sequestrant therapy. [Clin Med (Lond)](http://www.ncbi.nlm.nih.gov/pubmed/?term=orekoya.+Clinical+Medicine+2015%3B+15%3A+252-7) 2015; 15: 252-7.

50.- [Mearin F](http://www.ncbi.nlm.nih.gov/pubmed/?term=Mearin%20F%5BAuthor%5D&cauthor=true&cauthor_uid=17376361). Síndrome del intestino irritable: nuevos criterios de Roma III. [Med Clin](http://www.ncbi.nlm.nih.gov/pubmed/?term=Ferm%C3%ADn+Mearin.+Med+Clin+2007%3B+128%3A+335-343" \o "Medicina clínica.) 2007; 128: 335-43.

51.- [Slattery SA](http://www.ncbi.nlm.nih.gov/pubmed/?term=Slattery%20SA%5BAuthor%5D&cauthor=true&cauthor_uid=25913530), [Niaz O](http://www.ncbi.nlm.nih.gov/pubmed/?term=Niaz%20O%5BAuthor%5D&cauthor=true&cauthor_uid=25913530), [Aziz Q](http://www.ncbi.nlm.nih.gov/pubmed/?term=Aziz%20Q%5BAuthor%5D&cauthor=true&cauthor_uid=25913530), [Ford AC](http://www.ncbi.nlm.nih.gov/pubmed/?term=Ford%20AC%5BAuthor%5D&cauthor=true&cauthor_uid=25913530), [Farmer AD](http://www.ncbi.nlm.nih.gov/pubmed/?term=Farmer%20AD%5BAuthor%5D&cauthor=true&cauthor_uid=25913530). Systematic review with meta-analysis: the prevalence of bile acid malabsorption in the irritable bowel syndrome with diarrhoea. [Aliment Pharmacol Ther](http://www.ncbi.nlm.nih.gov/pubmed/?term=Slattery+et+al.+Aliment+Pharmacol+Ther+2015%3B+42%3A+3-11) 2015; 42: 3-11.

52.- Ford GA, Preece JD, Davies IH, Wilkinson SP. Use of the SeHCAT test in the investigation of diarrhea. Postgrad Med J 1992; 68: 272-6.

53.- [Phillips F](https://www.ncbi.nlm.nih.gov/pubmed/?term=Phillips%20F%5BAuthor%5D&cauthor=true&cauthor_uid=25728737), [Muls AC](https://www.ncbi.nlm.nih.gov/pubmed/?term=Muls%20AC%5BAuthor%5D&cauthor=true&cauthor_uid=25728737), [Lalji A](https://www.ncbi.nlm.nih.gov/pubmed/?term=Lalji%20A%5BAuthor%5D&cauthor=true&cauthor_uid=25728737), [Andreyev HJ](https://www.ncbi.nlm.nih.gov/pubmed/?term=Andreyev%20HJ%5BAuthor%5D&cauthor=true&cauthor_uid=25728737). Are bile acid malabsorption and bile acid diarrhoea important causes of loose stool complicating cancer therapy?. [Colorectal Dis](https://www.ncbi.nlm.nih.gov/pubmed/?term=Phillips+et+al.+Colorectal+Disease+2015%3B+17%3A+730-734) 2015; 17: 730-4.

54.- [Beigel F](https://www.ncbi.nlm.nih.gov/pubmed/?term=Beigel%20F%5BAuthor%5D&cauthor=true&cauthor_uid=24953836), [Teich N](https://www.ncbi.nlm.nih.gov/pubmed/?term=Teich%20N%5BAuthor%5D&cauthor=true&cauthor_uid=24953836), [Howaldt S](https://www.ncbi.nlm.nih.gov/pubmed/?term=Howaldt%20S%5BAuthor%5D&cauthor=true&cauthor_uid=24953836), Lammert F, [Maul J](https://www.ncbi.nlm.nih.gov/pubmed/?term=Maul%20J%5BAuthor%5D&cauthor=true&cauthor_uid=24953836), [Breiteneicher S](https://www.ncbi.nlm.nih.gov/pubmed/?term=Breiteneicher%20S%5BAuthor%5D&cauthor=true&cauthor_uid=24953836), et al. Colesevelam for the treatment of bile acid malabsorption-associated diarrhea in patients with Crohn's disease: a randomized, double-blind, placebo-controlled study. [J Crohns Colitis](https://www.ncbi.nlm.nih.gov/pubmed/?term=colesevelam+for+the+treatment+of+bile+acid+malabsorption-associated+diarrhea+in+patients+with+crohn%C2%B4s+disease) 2014; 8: 1471-9.

55.- [Bajor A](https://www.ncbi.nlm.nih.gov/pubmed/?term=Bajor%20A%5BAuthor%5D&cauthor=true&cauthor_uid=17094773), [Kilander A](https://www.ncbi.nlm.nih.gov/pubmed/?term=Kilander%20A%5BAuthor%5D&cauthor=true&cauthor_uid=17094773), [Gälman C](https://www.ncbi.nlm.nih.gov/pubmed/?term=G%C3%A4lman%20C%5BAuthor%5D&cauthor=true&cauthor_uid=17094773), [Rudling M](https://www.ncbi.nlm.nih.gov/pubmed/?term=Rudling%20M%5BAuthor%5D&cauthor=true&cauthor_uid=17094773), [Ung KA](https://www.ncbi.nlm.nih.gov/pubmed/?term=Ung%20KA%5BAuthor%5D&cauthor=true&cauthor_uid=17094773). Budesonide treatment is associated with increased bile acid absorption in collagenous colitis. [Aliment Pharmacol Ther](https://www.ncbi.nlm.nih.gov/pubmed/?term=budesonide+treatment+is+associated+with+increased+bile+acid+absorption) 2006; 24: 1643-9.

56.- [Thomas PD](https://www.ncbi.nlm.nih.gov/pubmed/?term=Thomas%20PD%5BAuthor%5D&cauthor=true&cauthor_uid=12801941), [Forbes A](https://www.ncbi.nlm.nih.gov/pubmed/?term=Forbes%20A%5BAuthor%5D&cauthor=true&cauthor_uid=12801941), [Green J](https://www.ncbi.nlm.nih.gov/pubmed/?term=Green%20J%5BAuthor%5D&cauthor=true&cauthor_uid=12801941), [Howdle P](https://www.ncbi.nlm.nih.gov/pubmed/?term=Howdle%20P%5BAuthor%5D&cauthor=true&cauthor_uid=12801941), [Long R](https://www.ncbi.nlm.nih.gov/pubmed/?term=Long%20R%5BAuthor%5D&cauthor=true&cauthor_uid=12801941), [Playford R](https://www.ncbi.nlm.nih.gov/pubmed/?term=Playford%20R%5BAuthor%5D&cauthor=true&cauthor_uid=12801941), et al. Guidelines for the investigation of chronic diarrhoea, 2nd edition. [Gut](https://www.ncbi.nlm.nih.gov/pubmed/12801941) 2003; 52 Suppl 5:v1-15.

57.- [Arasaradnam RP](https://www.ncbi.nlm.nih.gov/pubmed/?term=Arasaradnam%20RP%5BAuthor%5D&cauthor=true&cauthor_uid=22395031), [Cullis J](https://www.ncbi.nlm.nih.gov/pubmed/?term=Cullis%20J%5BAuthor%5D&cauthor=true&cauthor_uid=22395031), [Nwokolo C](https://www.ncbi.nlm.nih.gov/pubmed/?term=Nwokolo%20C%5BAuthor%5D&cauthor=true&cauthor_uid=22395031), [Bardhan K](https://www.ncbi.nlm.nih.gov/pubmed/?term=Bardhan%20K%5BAuthor%5D&cauthor=true&cauthor_uid=22395031), [Williams N](https://www.ncbi.nlm.nih.gov/pubmed/?term=Williams%20N%5BAuthor%5D&cauthor=true&cauthor_uid=22395031). Bile acid malabsorption and SeHCAT: the 'Cinderella' will be going to the Nuclear Medicine Ball!. [Nucl Med Commun](https://www.ncbi.nlm.nih.gov/pubmed/?term=Arasaradnam+et+al.+Nucl+Med+Communications+2012%3B+33%3A+449-451) 2012; 33: 449-51.
